# Supplementary material
Source: MDPI journal article supplement (https://www.mdpi.com/2073-4352/12/9/1205)
Supplement: s1 [file s1]

## Supplementary Data

Table S1. Reaction enthalpy ( $\Delta H_f$  in kcal/mol) of deprotonated pentachlorophenol (pcp-H)/deprotonated 6-OH-BDE-47 (6ohbde47-H) adsorbed by the zigzag (9,0) and (18,0) boron nitride nanotubes decorated with CePc<sub>2</sub>, EuPc<sub>2</sub>, TbPc<sub>2</sub> and YbPc<sub>2</sub> complexes

| $\Delta H_f$            |             |                                      |                           | $\Delta H_f$            |             |                                      |                           |
|-------------------------|-------------|--------------------------------------|---------------------------|-------------------------|-------------|--------------------------------------|---------------------------|
|                         |             |                                      | (kcal mol <sup>-1</sup> ) |                         |             |                                      | (kcal mol <sup>-1</sup> ) |
| BN90_CePc <sub>2</sub>  | +pcp-H      | →BN90_CePc <sub>2</sub> _pcp-H       | <b>-5.2061</b>            | BN90_TbPc <sub>2</sub>  | +pcp-H      | →BN90_TbPc <sub>2</sub> _pcp-H       | <b>-1.8587</b>            |
| BN90_CePc <sub>2</sub>  | +6ohbde47-H | →BN90_CePc <sub>2</sub> _6ohbde47-H  | <b>7.4113</b>             | BN90_TbPc <sub>2</sub>  | +6ohbde47-H | →BN90_TbPc <sub>2</sub> _6ohbde47-H  | <b>9.3292</b>             |
| BN180_CePc <sub>2</sub> | +pcp-H      | →BN180_CePc <sub>2</sub> _pcp-H      | <b>2.5082</b>             | BN180_TbPc <sub>2</sub> | +pcp-H      | →BN180_TbPc <sub>2</sub> _pcp-H      | <b>3.4442</b>             |
| BN180_CePc <sub>2</sub> | +6ohbde47-H | →BN180_CePc <sub>2</sub> _6ohbde47-H | <b>6.6059</b>             | BN180_TbPc <sub>2</sub> | +6ohbde47-H | →BN180_TbPc <sub>2</sub> _6ohbde47-H | <b>8.9916</b>             |
| BN90_EuPc <sub>2</sub>  | +pcp-H      | →BN90_EuPc <sub>2</sub> _pcp-H       | <b>-2.1945</b>            | BN90_YbPc <sub>2</sub>  | +pcp-H      | →BN90_YbPc <sub>2</sub> _pcp-H       | <b>-0.5749</b>            |
| BN90_EuPc <sub>2</sub>  | +6ohbde47-H | →BN90_EuPc <sub>2</sub> _6ohbde47-H  | <b>9.2920</b>             | BN90_YbPc <sub>2</sub>  | +6ohbde47-H | →BN90_YbPc <sub>2</sub> _6ohbde47-H  | <b>10.2177</b>            |
| BN180_EuPc <sub>2</sub> | +pcp-H      | →BN180_EuPc <sub>2</sub> _pcp-H      | <b>3.2563</b>             | BN180_YbPc <sub>2</sub> | +pcp-H      | →BN180_YbPc <sub>2</sub> _pcp-H      | <b>3.6879</b>             |
| BN180_EuPc <sub>2</sub> | +6ohbde47-H | →BN180_EuPc <sub>2</sub> _6ohbde47-H | <b>8.8058</b>             | BN180_YbPc <sub>2</sub> | +6ohbde47-H | →BN180_YbPc <sub>2</sub> _6ohbde47-H | <b>9.0798</b>             |

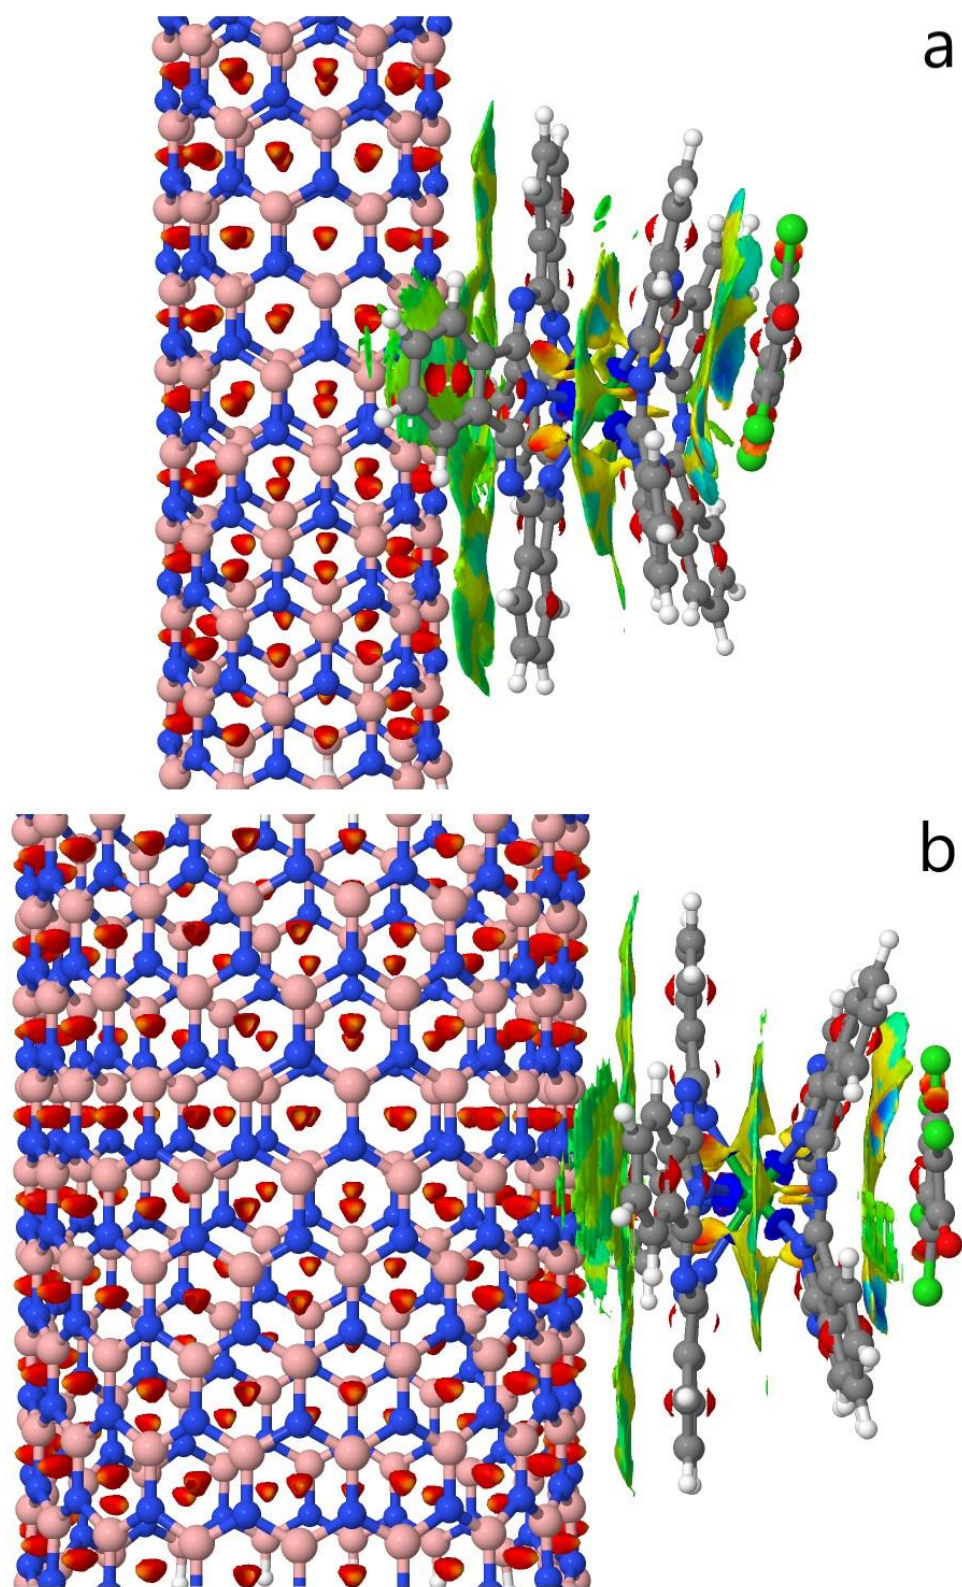

Figure S1. Non-covalent interaction between deprotonated pentachlorophenol (pcp-H) and the zigzag (a) (9,0) (b) (18,0) boron nitride nanotube decorated with YbPc<sub>2</sub> complex.

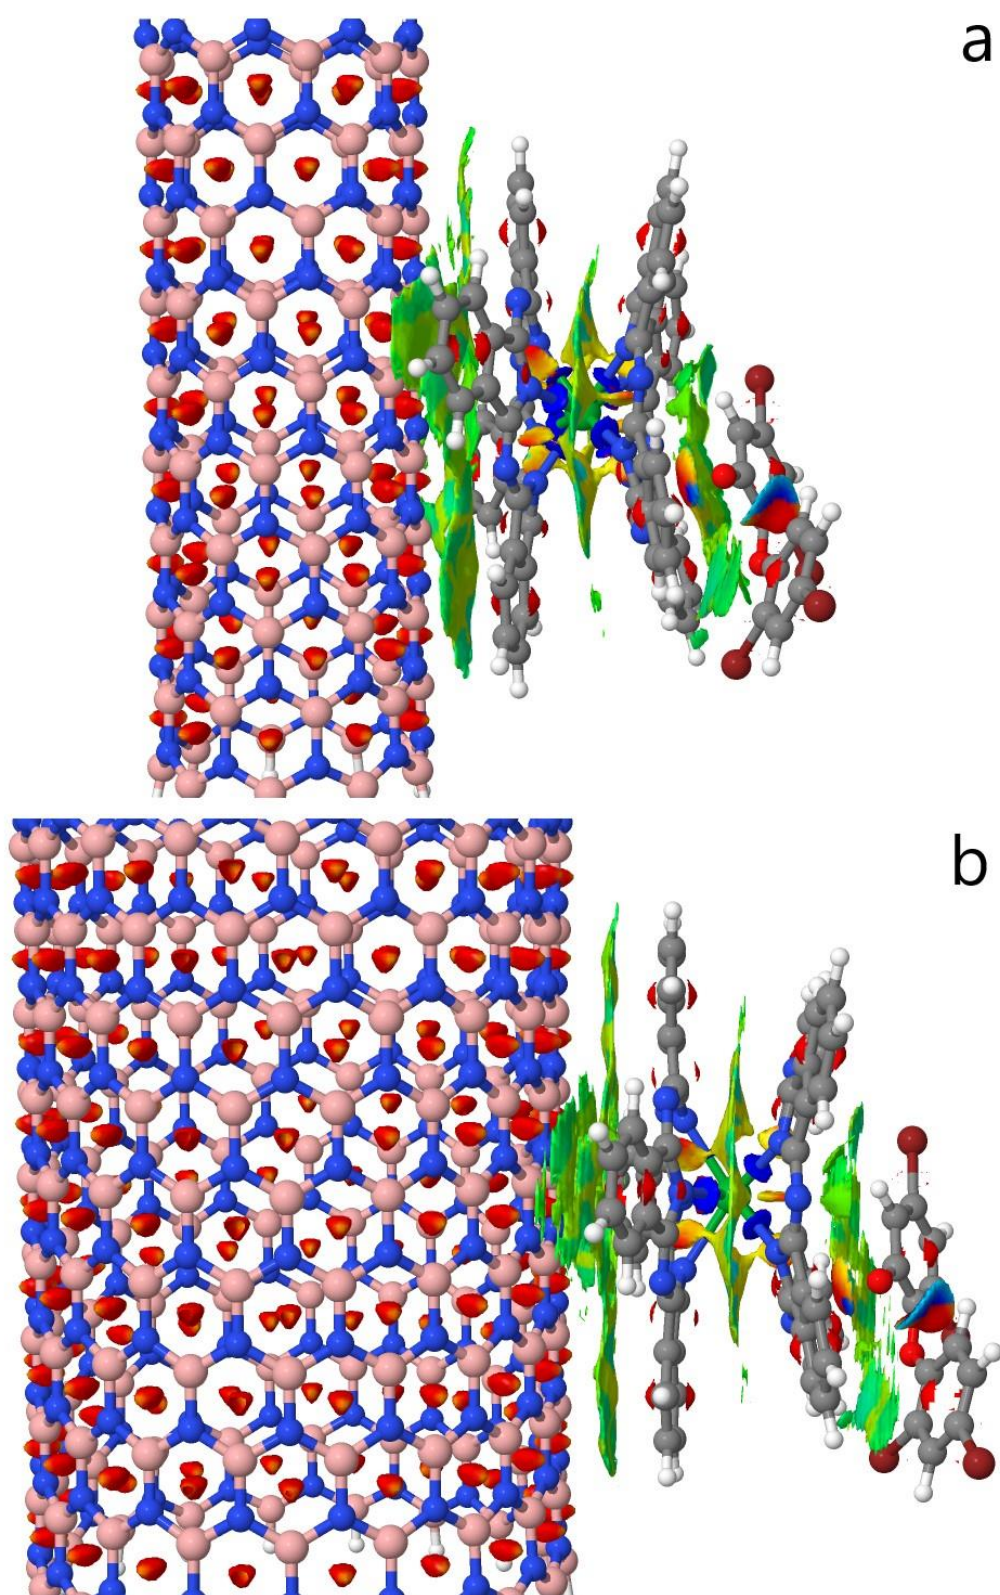

Figure S2. Non-covalent interaction between deprotonated 6-OH-BDE-47 (6ohbde47-H) and the zigzag (a) (9,0) (b) (18,0) boron nitride nanotube decorated with YbPc<sub>2</sub> complex.



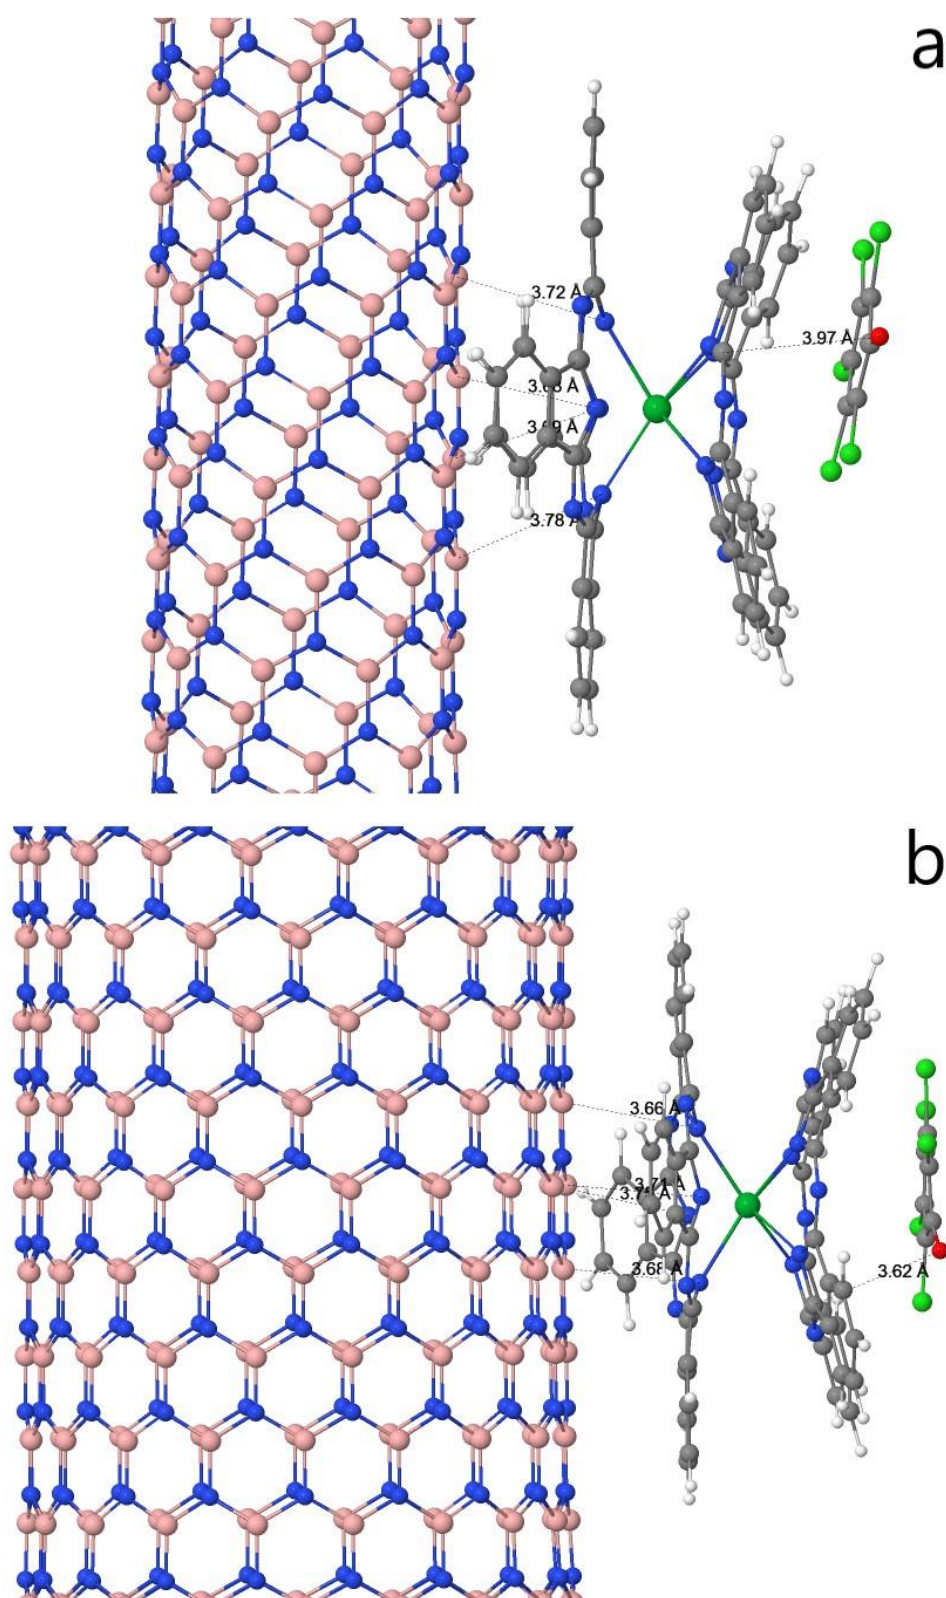

Figure S3. Equilibrium structures of deprotonated pentachlorophenol (pcp-H) adsorbed on the zigzag (a) (9,0) (b) (18,0) boron nitride nanotube decorated with YbPc<sub>2</sub> complex.

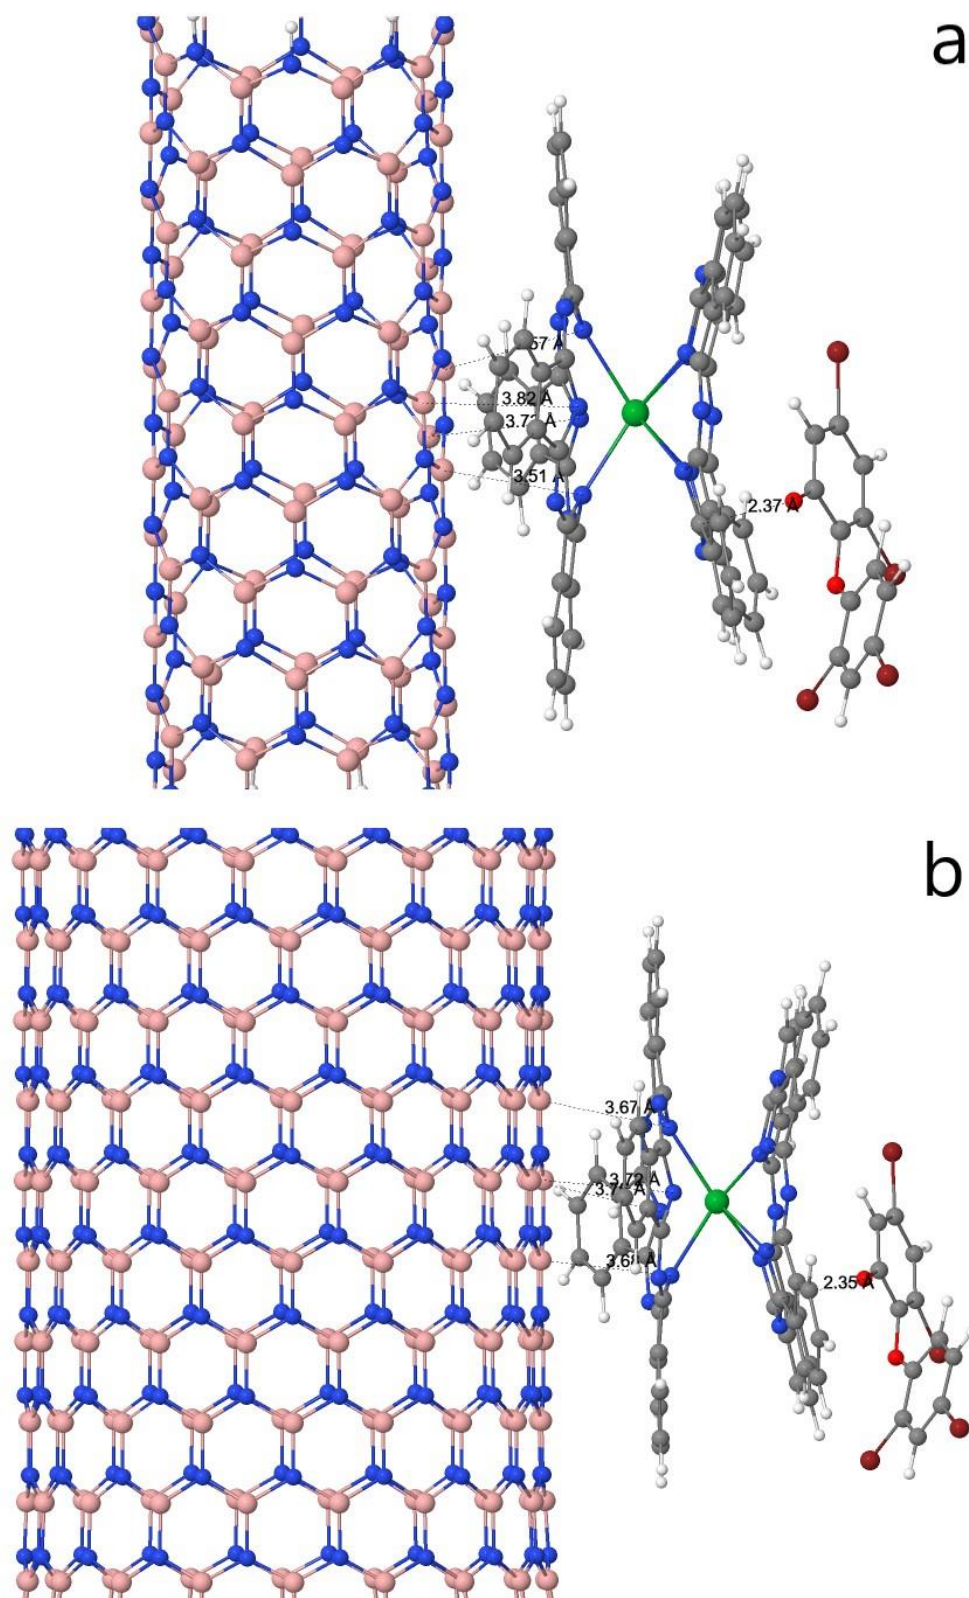

Figure S4. Equilibrium structures of deprotonated 6-OH-BDE-47 (6ohbde47-H) adsorbed on the zigzag (a) (9,0) (b) (18,0) boron nitride nanotube decorated with YbPc<sub>2</sub> complex.
